# Supplementary material for: Butyrate Prevents TGF-β1-Induced Alveolar Myofibroblast Differentiation and Modulates Energy Metabolism
Source: MDPI journal article supplement (doi:10.3390/metabo11050258), 2021-04-22
Supplement: s1 [file s1]

# Butyrate prevents TGF- $\beta$ 1–induced alveolar myofibroblast differentiation and modulates energy metabolism

Hyo Yeong Lee <sup>1,^</sup>, Somi Nam <sup>2,^</sup>, Mi-Jeong Kim <sup>2,^</sup>, Su Jung Kim <sup>1</sup>, Sung Hoon Back <sup>2,\*</sup>, and Hyun Ju Yoo <sup>1,\*</sup>

<sup>1</sup> Department of Convergence Medicine, Asan Institute for Life Sciences, Asan Medical Center, University of Ulsan College of Medicine, Seoul 05505, Republic of Korea

<sup>2</sup> School of Biological Sciences, University of Ulsan, Ulsan 44610, Republic of Korea

<sup>^</sup> These authors contributed equally to this work.

## Supplementary Figures

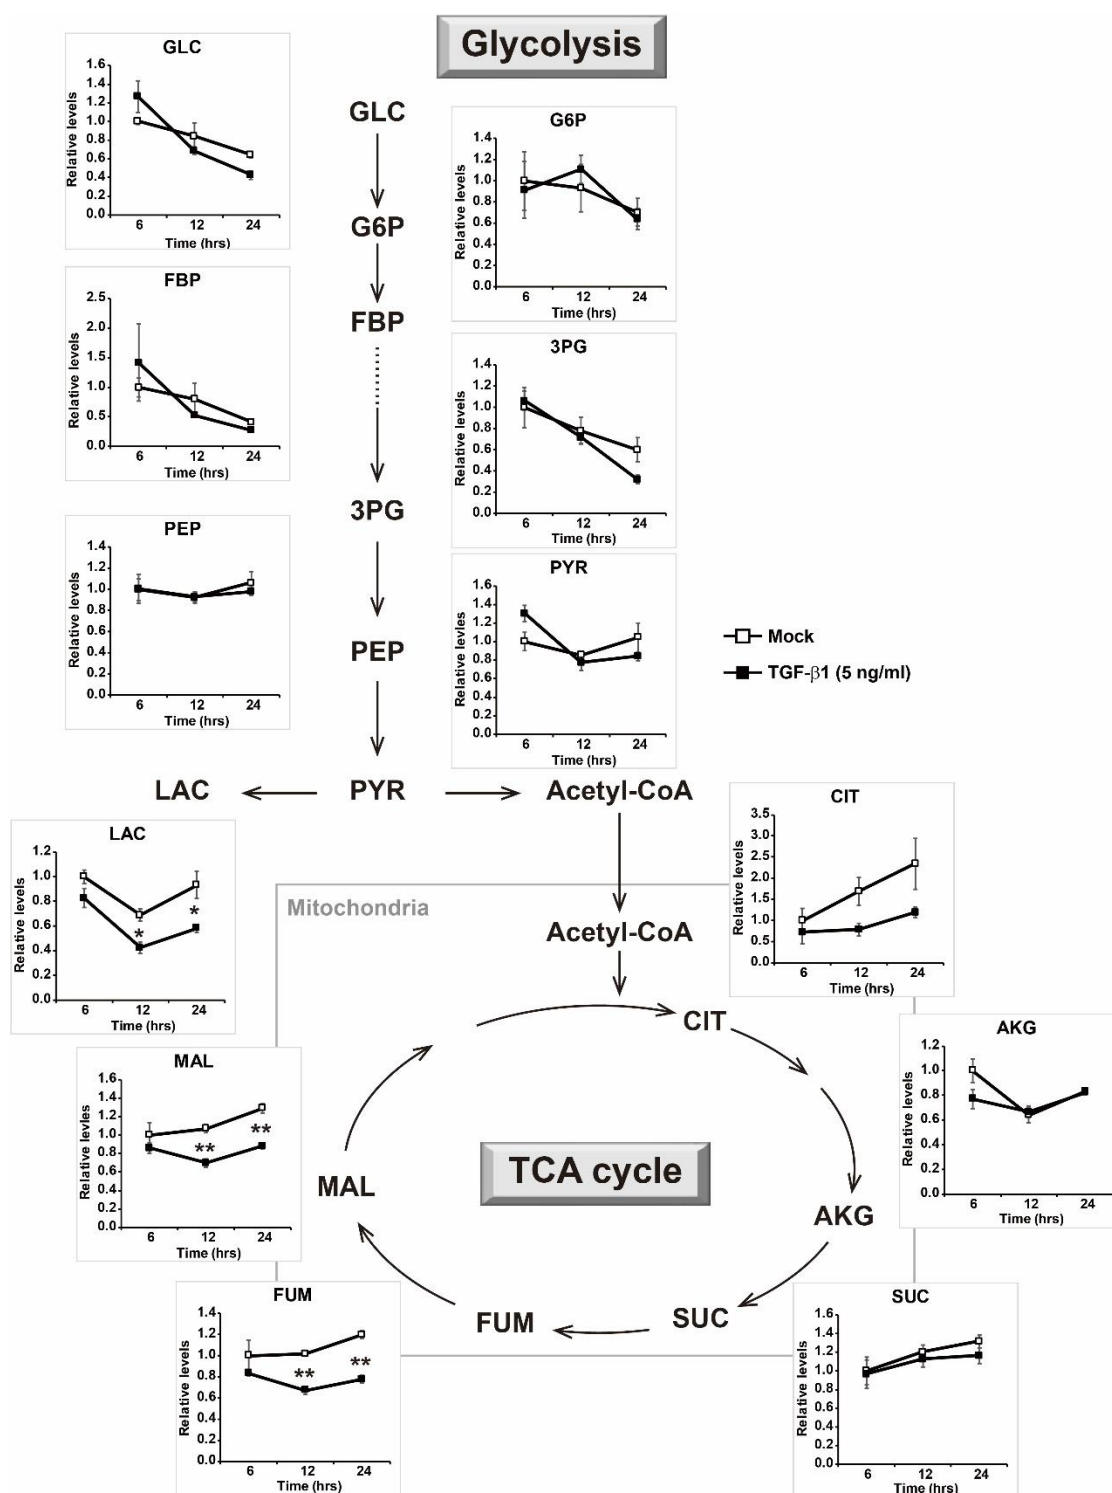

**Figure S1.** Effect of TGF-β1 on changes in metabolites involved in energy metabolism in pulmonary fibroblasts. Cells were treated with PBS (Mock) or 5 ng/ml TGF-β1 for 24 hrs. The data are expressed as means ± SEM of three independent experiments, \*P<0.05 and \*\*P<0.01; Mock-treated cells vs. TGF-β1-treated cells.

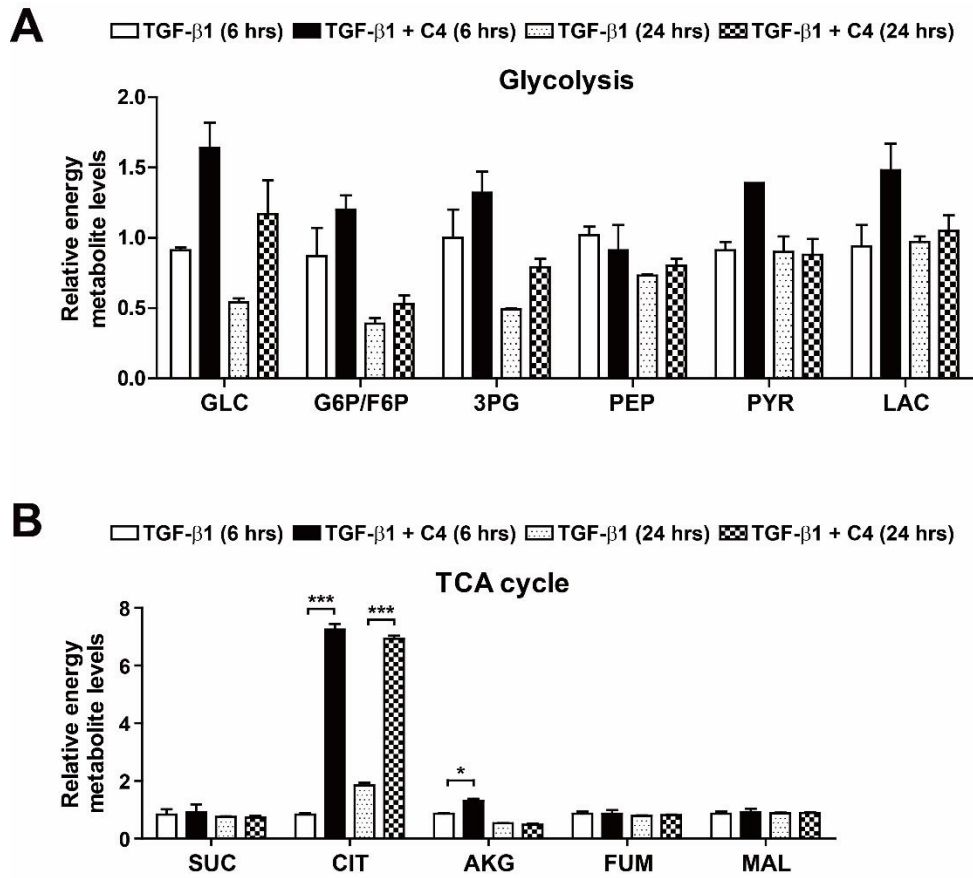

**Figure S2.** Effect of butyrate on changes in metabolites involved in energy metabolism in TGF- $\beta$ 1-treated pulmonary fibroblasts. MRC5 cells were treated with TGF- $\beta$ 1 (5 ng/ml) for the indicated times with or without C4 (5 mM). Data are expressed as means  $\pm$  SEM of three independent experiments, \* $P$ <0.05 and \*\*\* $P$ <0.001; TGF- $\beta$ 1-treated cells vs. TGF- $\beta$ 1 + C4-treated cells.

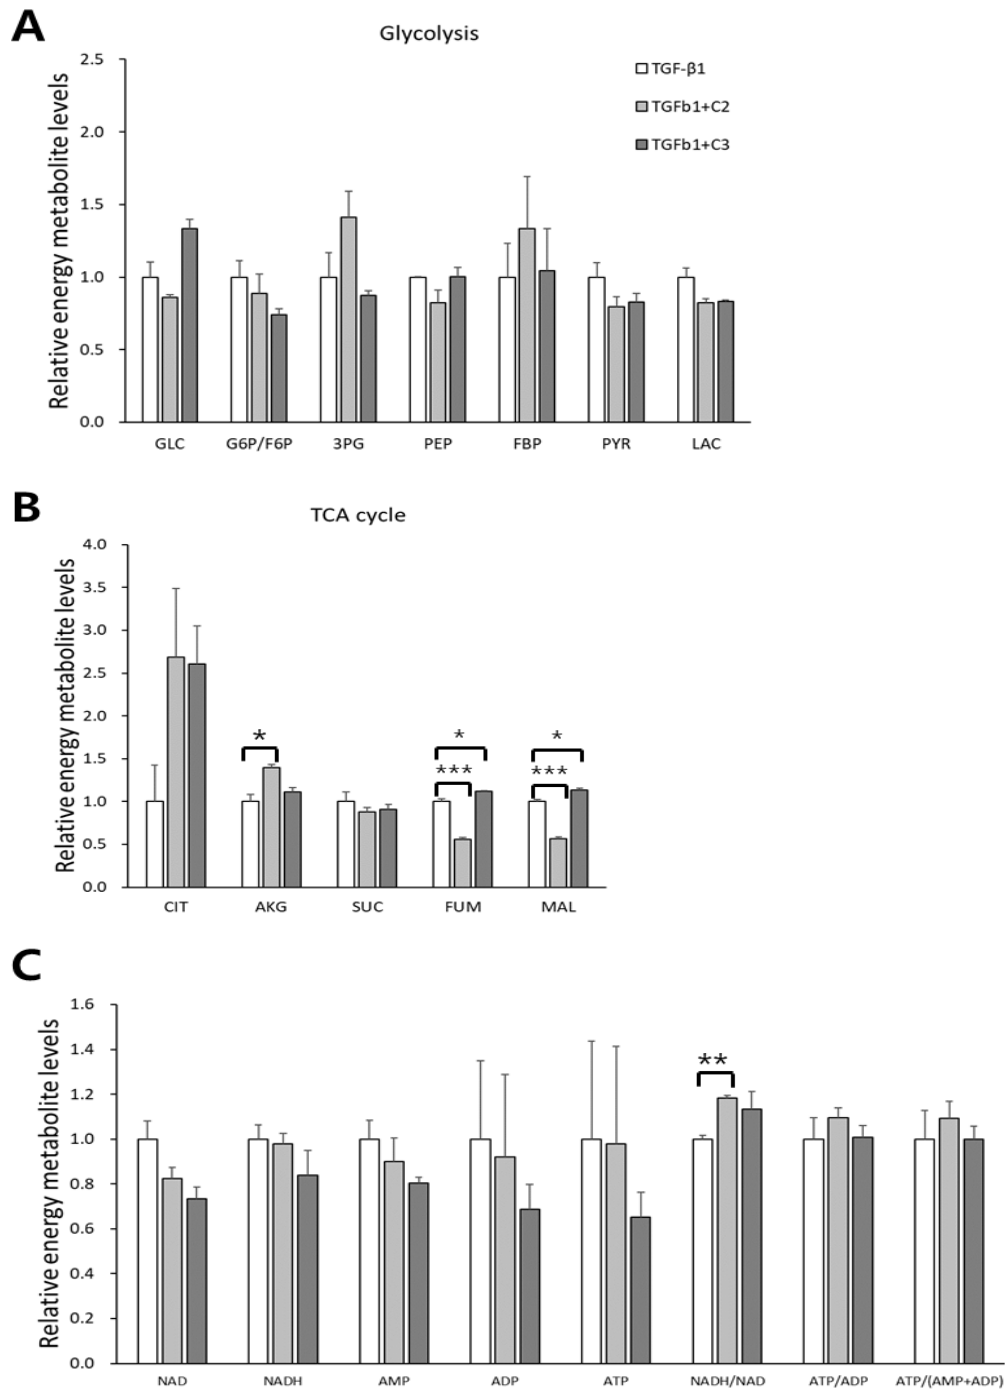

**Figure S3.** Effect of acetate and propionate on changes in metabolites involved in energy metabolism in TGF- $\beta$ 1-treated pulmonary fibroblasts. MRC5 cells were treated with TGF- $\beta$ 1 (5 ng/ml) for 24 hrs with or without C2 (5 mM) or C3 (5mM). Data are expressed as means  $\pm$  SEM of three independent experiments, \* $P$ <0.05, \*\* $P$ <0.01 and \*\*\* $P$ <0.01; TGF- $\beta$ 1-treated cells vs. TGF- $\beta$ 1 + C2 (or C3)-treated cells.
